# Supplementary material
Source: PubMed Central journal article supplement (PMC6949377)
Supplement: NIHMS1545057-supplement-1.pdf [file NIHMS1545057-supplement-1.pdf]

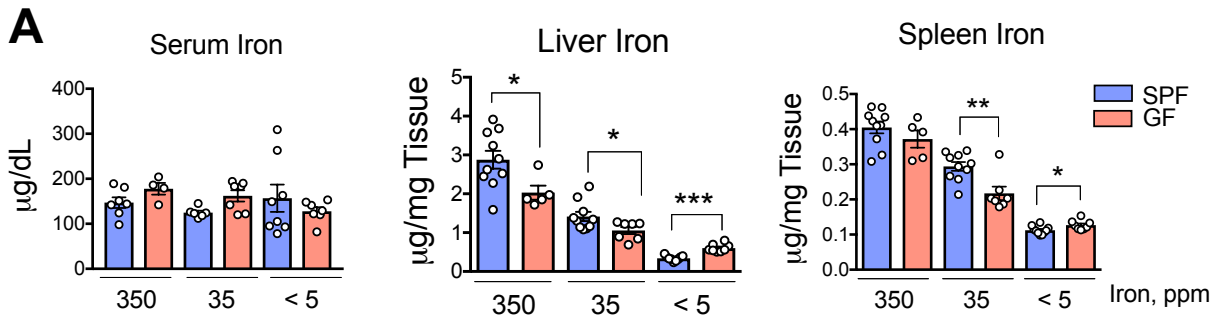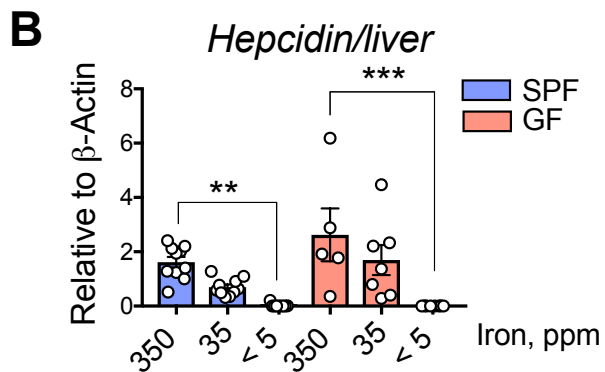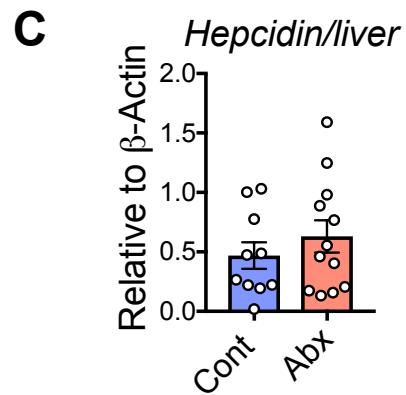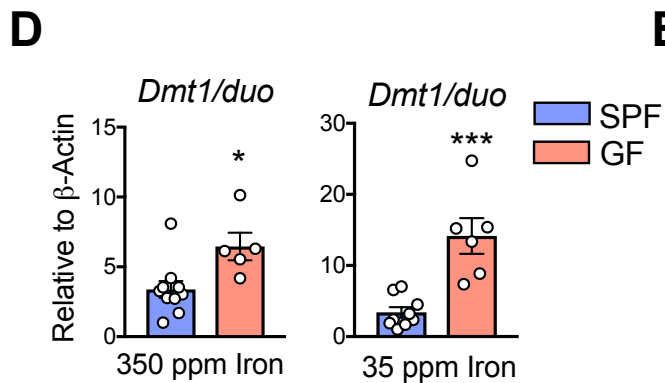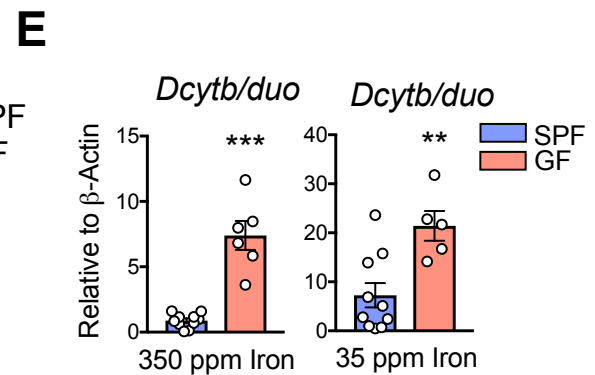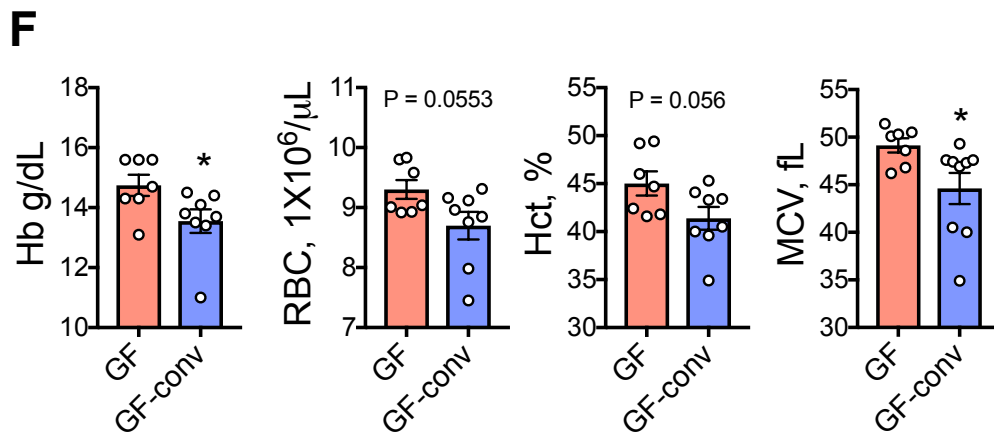

**Supplementary Figure 1. Related to Figure 1.** **A)** Serum, liver and spleen iron levels in SPF and GF mice fed with 350-ppm, 35-ppm or < 5-ppm iron diet and **B)** Hepatic hepcidin gene expression analysis in them. **C)** Hepatic hepcidin gene expression analysis in control vs. Abx treated wild type SPF mice. Gene expression analysis of **D)** *Dmt1* and **E)** *Dcytb* in SPF and GF mice fed with 350-ppm or 35-ppm iron diet. **F)** CBC values of GF and GF-conv mice. All data are mean  $\pm$  SEM. t-test (A(between corresponding iron diet groups), C, D, E, F) or one way ANOVA with Tukey's multiple comparisons test (B). \* P < 0.05, \*\* P < 0.01, \*\*\* P < 0.001.

**A**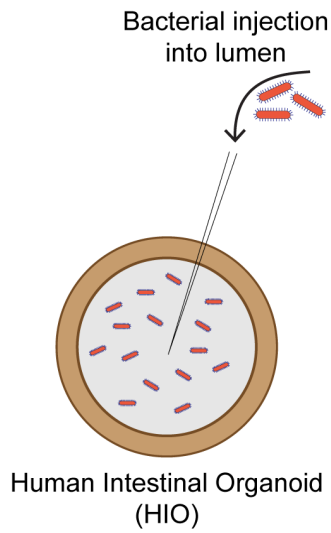**B**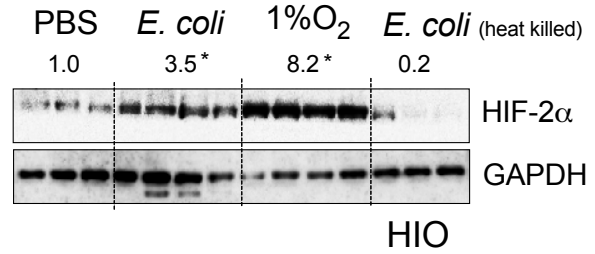**C**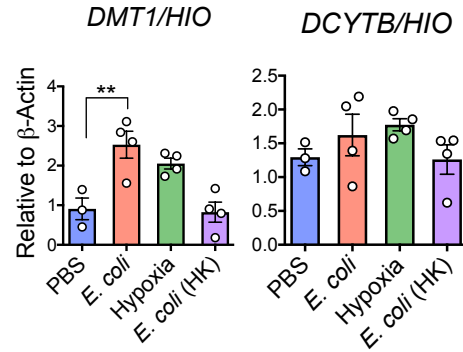**D**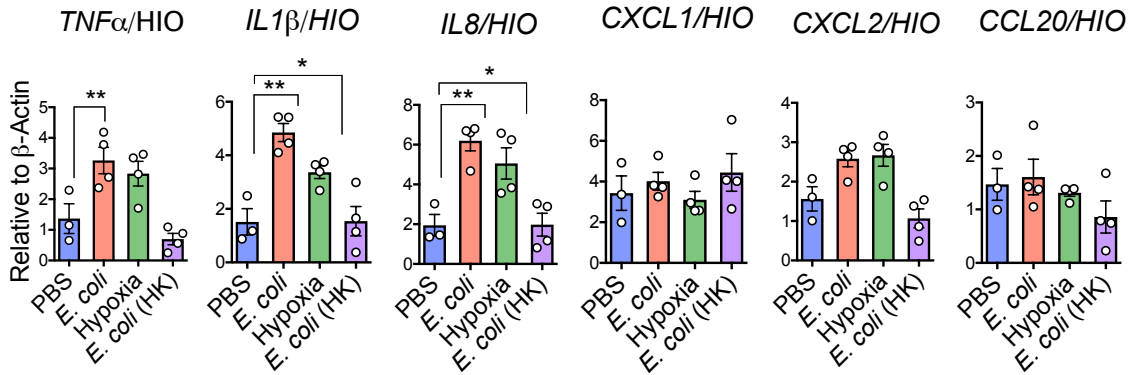**E**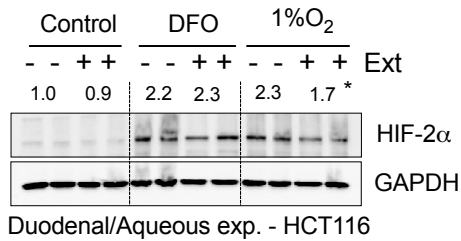**F**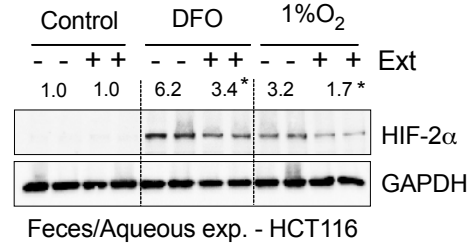**G**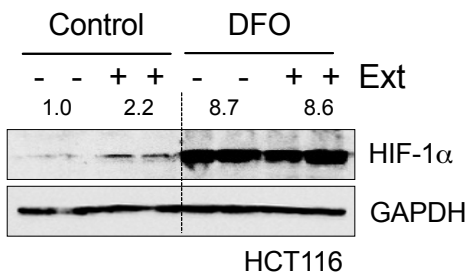**H**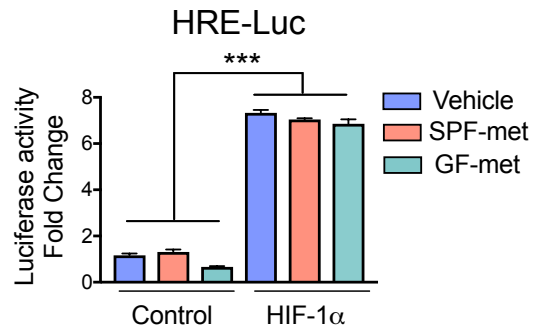

**Supplementary Figure 2. Related to Figure 2.** **A)** Schematic showing bacterial injection into a human intestinal organoid (HIO). HIOs were treated with PBS, 1% O<sub>2</sub>, live or heat-killed *E. coli*. HIF-2 $\alpha$  Western analysis (**B**); gene expression analyses of intestinal iron transporters (**C**) and HIF-dependent inflammatory markers (**D**). **E) and F)** HIF-2 $\alpha$  Western analyses of DFO- or 1% O<sub>2</sub> treated HCT116 cells followed by treatment with duodenal and fecal aqueous extracts (Ext), respectively. **G)** HIF-1 $\alpha$  Western analysis of DFO-treated HCT116 cells followed by treatment with fecal organic extract (Ext). **H)** HIF response element (HRE) luciferase assay in HCT116 cells transfected with empty vector (control) or HIF-1 $\alpha$ , followed by treatment with vehicle (DMSO) or fecal organic extracts from SPF- (SPF-met) and GF (GF-met) mice (n=3). All data are mean  $\pm$  SEM. One way ANOVA with Tukey's multiple comparisons test (C, D and H). Western analyses : Images were analyzed by Image J software from three independent experiments, representative image shown. Statistical significance compared with PBS group (B) and DFO-only treatment group (E, F and G). \* P < 0.05, \*\* P < 0.01, \*\*\* P < 0.001.

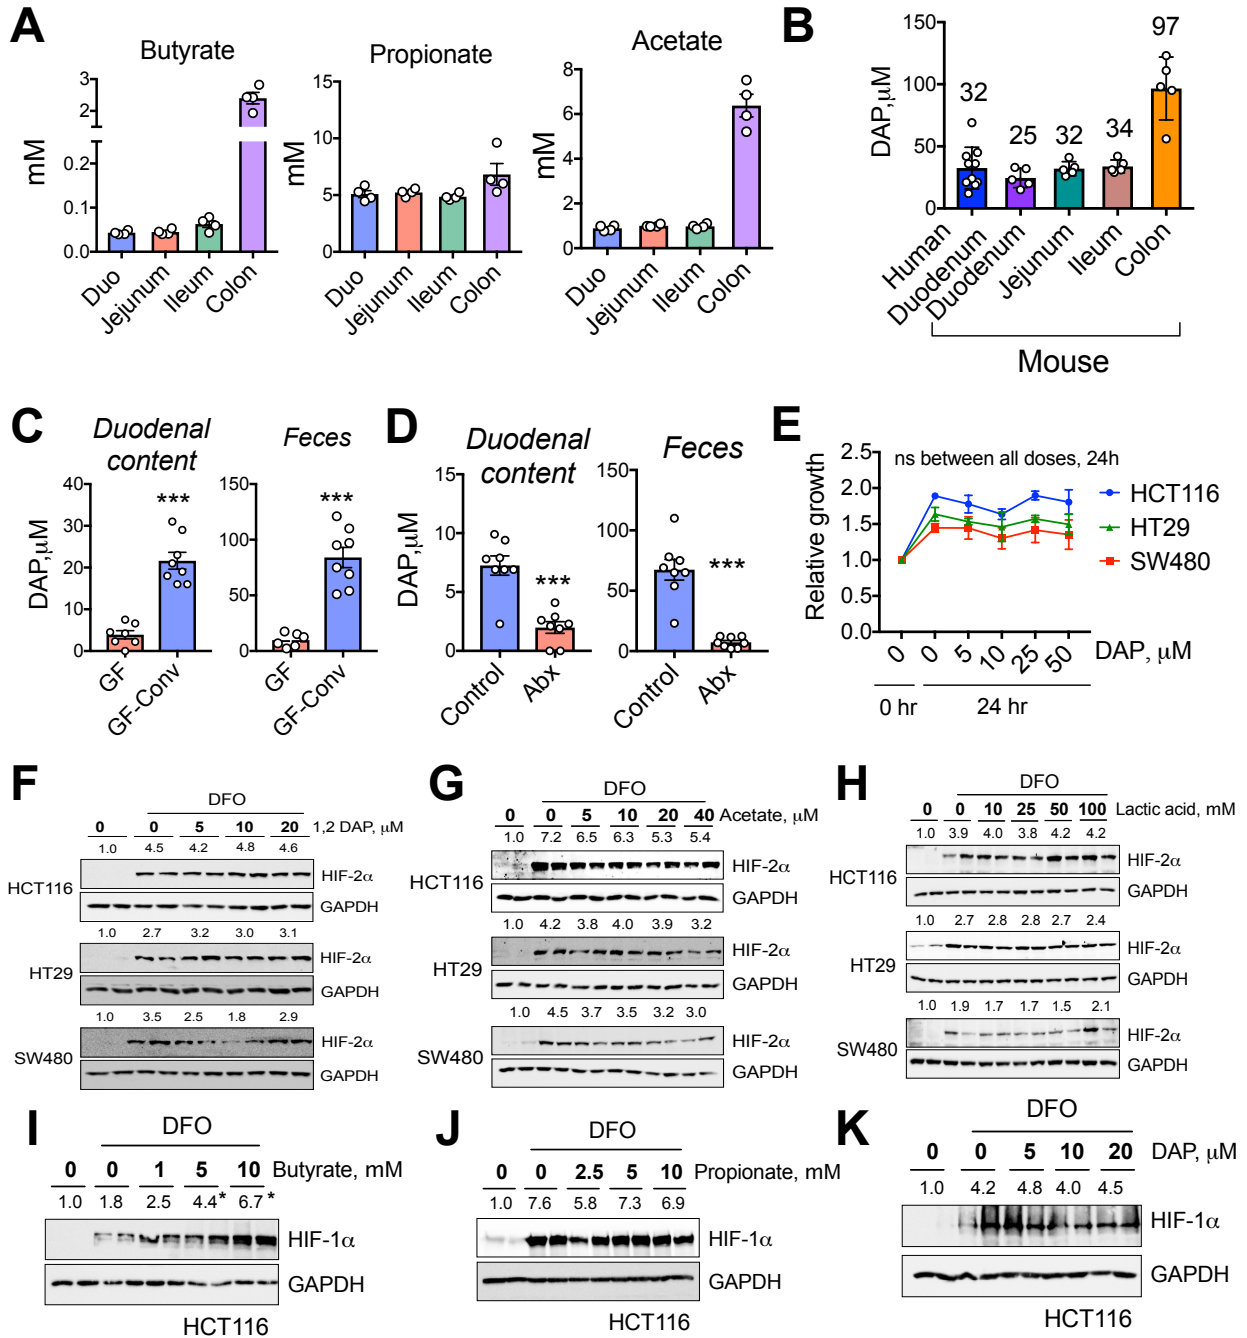

**Supplementary Figure 3. Related to Figure 2.** **A)** Physiological concentrations of butyrate, propionate and acetate in the mouse intestine. **B)** Mean physiological DAP concentrations in human duodenum and mouse intestine. **C)** DAP concentrations in GF and GF-conv duodenum and colon. **D)** DAP concentrations in wild type Abx-treated or –untreated (control) duodenum and colon. **E)** Cell growth assay of intestinal cell lines following DAP treatment (n=3). HIF-2 $\alpha$  Western analysis of DFO-treated HCT116, HT29 and SW480 cells followed by dose-dependent treatment of 1,2 diaminopropane (1,2 DAP) **(F)**, acetate **(G)** and lactic acid **(H)**. HIF-1 $\alpha$  Western analysis of DFO-treated HCT116 and HT29 cells followed by dose-dependent treatment of butyrate **(I)**, propionate **(J)** and DAP **(K)**.

All data are mean  $\pm$  SEM. t-test (C and D); one way ANOVA with Tukey's multiple comparisons test (E). Western analyses (F-K): Images were analyzed by Image J software from three independent experiments, representative image shown. Statistical significance compared with DFO-only treatment group. \* P < 0.05, \*\*\* P < 0.001.

**A**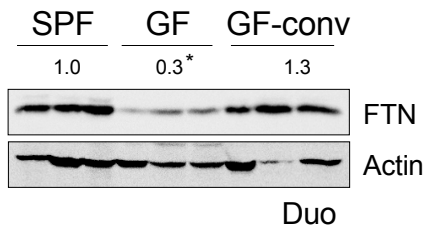**B**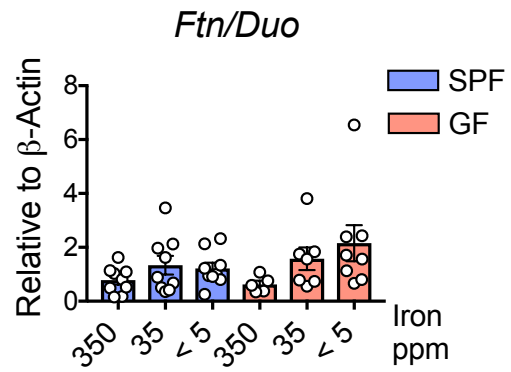**C**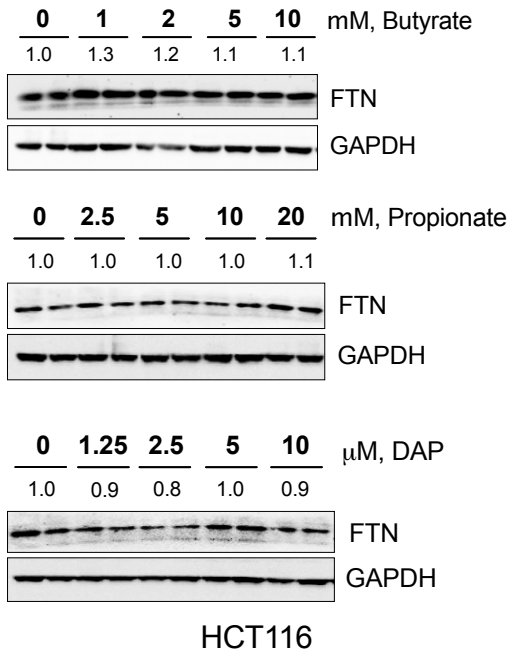**D**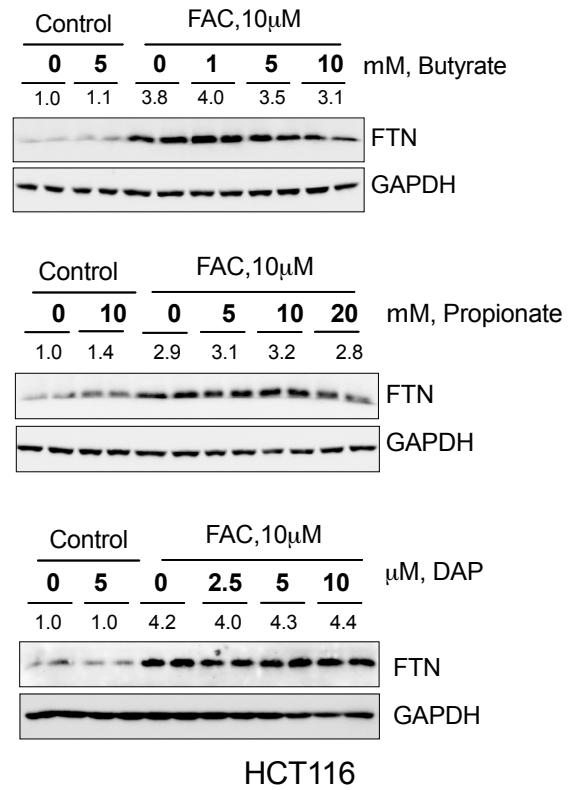

**Supplementary Figure 4. Related to Figure 3.** **A)** Comparative duodenal FTN Western analysis in SPF, GF and GF-conv mice. **B)** *Ftn* gene expression analysis in SPF and GF mice fed with 350-ppm, 35-ppm or <5-ppm iron diet. **C)** and **D)** FTN Western analysis in HCT116 cell with dose-dependent butyrate, propionate or DAP without or with FAC (10 $\mu$ M) pretreatment respectively.

All data are mean  $\pm$  SEM. Western analyses : Images were analyzed by Image J software from three independent experiments, representative image shown. Statistical significance compared with SPF group (A), no treatment group (C and D). \* P < 0.05



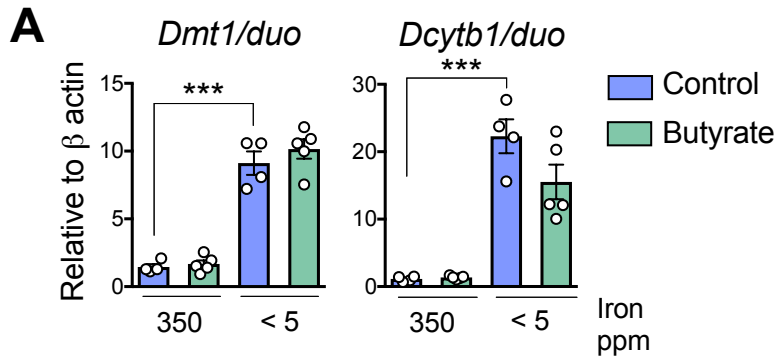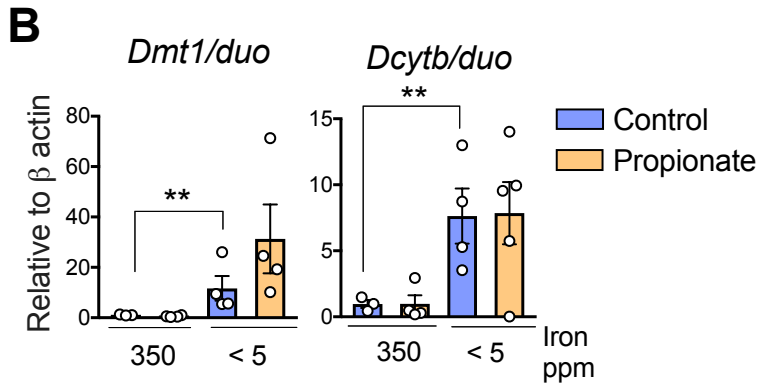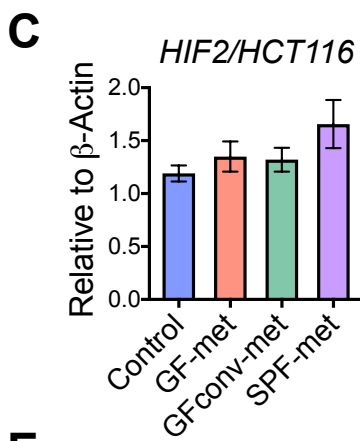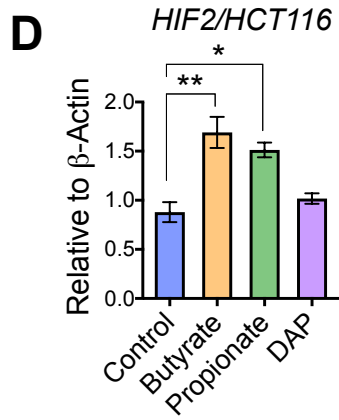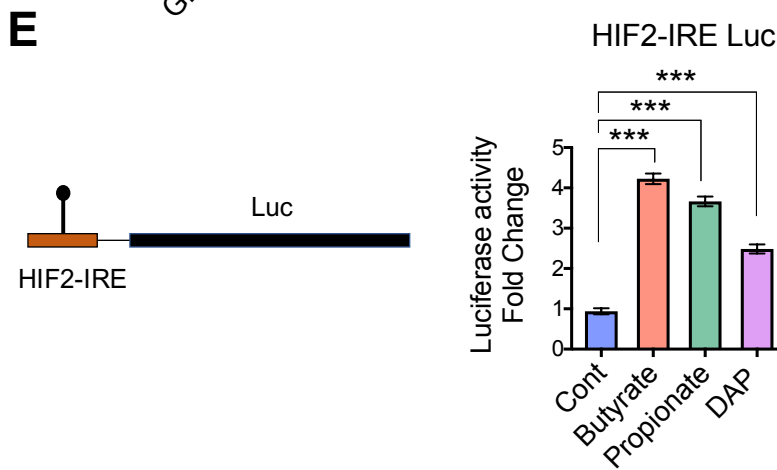

**Supplementary Figure 5. Related to Figure 4.** **A)** SPF mice were fed with 350-ppm and <5-ppm iron diet with or without butyrate supplementation in drinking water. Duodenal *Dmt1* and *Dcytb* gene expression analysis performed. **B)** SPF mice were fed with 350-ppm and <5-ppm iron diet with or without propionate supplementation in drinking water. Duodenal *Dmt1* and *Dcytb* gene expression analysis performed. **C)** *HIF-2 $\alpha$*  gene expression analysis in HCT116 cells treated with GF-met, GF-conv-met or SPF-met (n=3). **D)** *HIF-2 $\alpha$*  gene expression analysis in HCT116 cells treated with Butyrate (10mM), propionate (5mM) or DAP (10 $\mu$ M) (n=3). **E)** Schematic showing HIF2-IRE luciferase construct (upper panel) and HIF2-IRE luciferase assay in HCT116 cells treated with Butyrate (10mM), propionate (5mM) or DAP (10 $\mu$ M) (n=3). All data are mean  $\pm$  SEM. One way ANOVA with Tukey's multiple comparisons test (A-E). \*\* P < 0.01, \*\*\* P < 0.001.

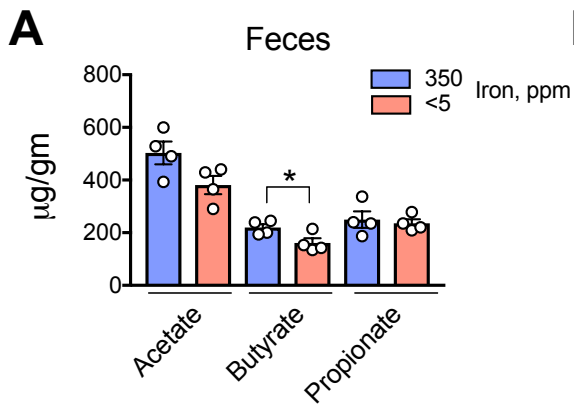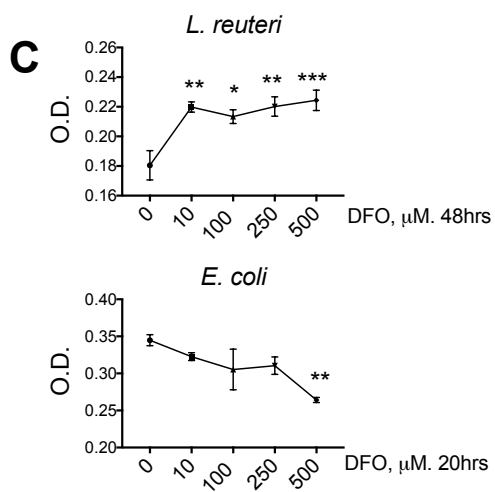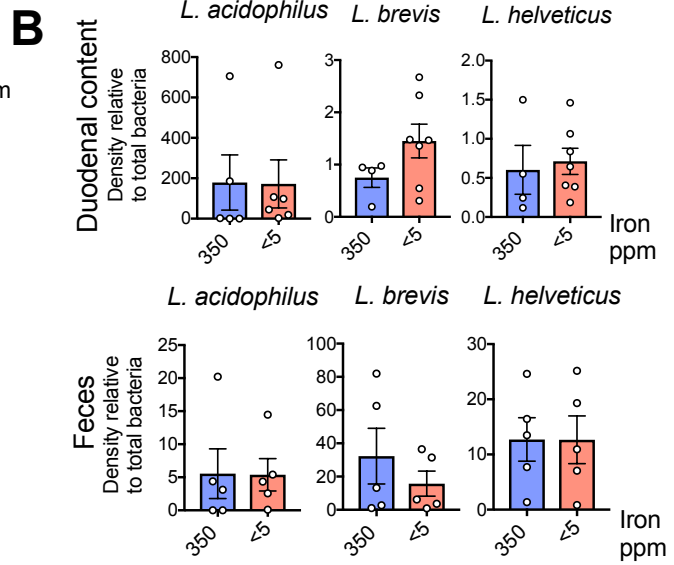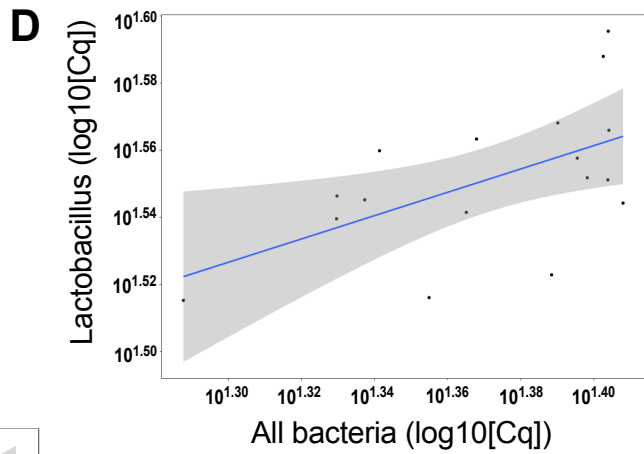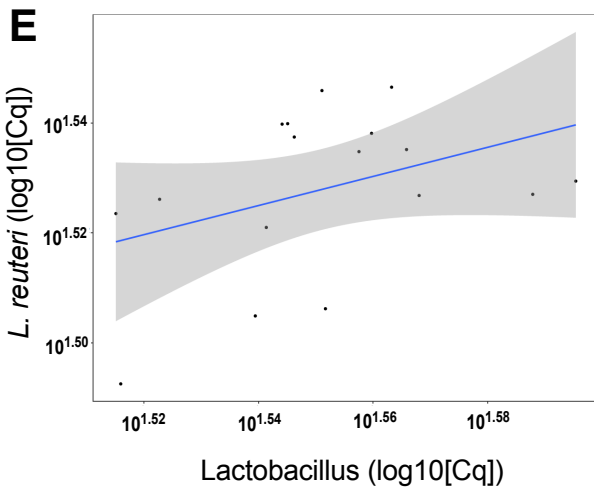

**Supplementary Figure 6. Related to Figure 6. A)** SPF mice were fed with 350-ppm and <5-ppm iron diet for 2 weeks, SCFA (acetate, butyrate and propionate) analysis in the feces.

**B)** Comparative analysis of *L.acidophilus*, *L. brevis* and *L.brevis* density by species specific PCR from duodenal content and feces. **C)** *L. reuteri* and *E. coli* growth *in vitro* with dose-dependent DFO treatment (n=3). DNA were extracted from duodenal aspirates of 17 healthy human subjects; **D)** lactobacillus abundance (relative to all bacteria) and **E)** *L. reuteri* abundance (relative to total lactobacilli) shown by Cq values of bacteria-specific PCR.

All data are mean  $\pm$  SEM. t-test (A, corresponding diet-groups with respects to SCFA; B); one way ANOVA with Tukey's multiple comparisons test (C).

\* P < 0.05, \*\* P < 0.01, \*\*\* P < 0.001.

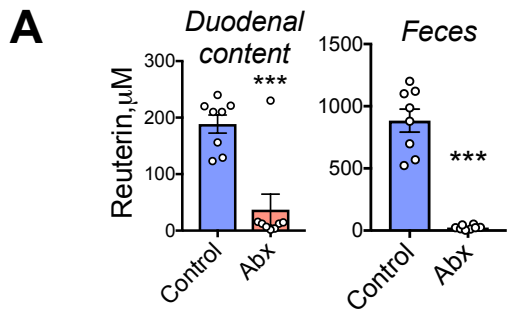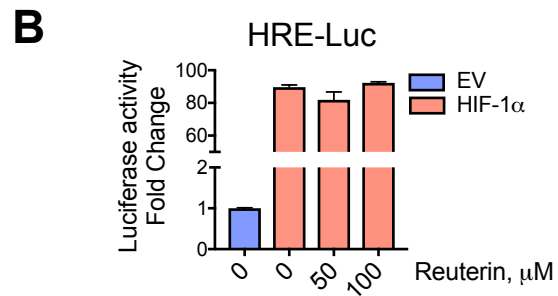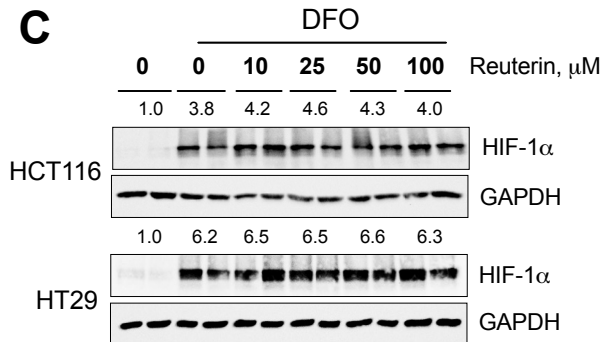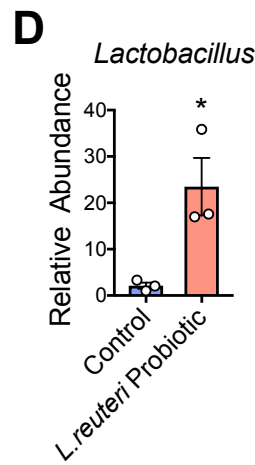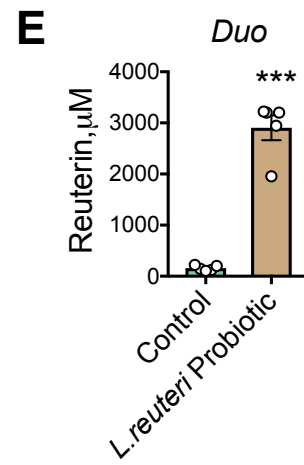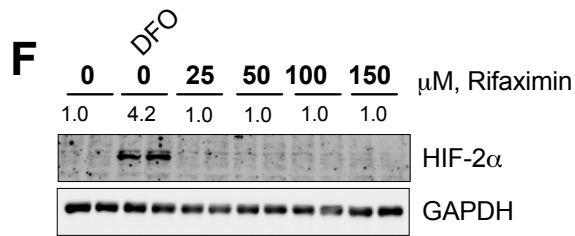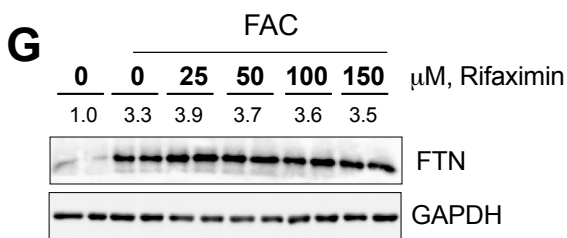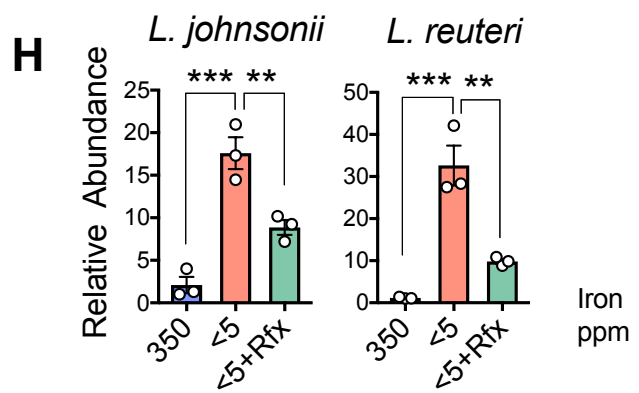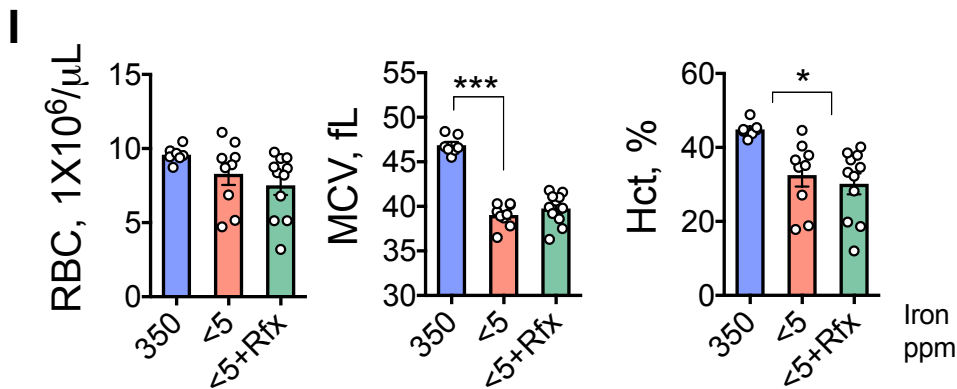

**Supplementary Figure 7. Related to Figure 7.** **A)** Reuterin concentrations in wild type Abx-treated or –untreated (control) duodenum and colon. **B)** HRE luciferase assay in HCT116 cells transfected with empty vector (control) or HIF-2 $\alpha$  followed by dose-dependent reuterin treatment (n=3). **C)** HIF-1 $\alpha$  Western analysis of DFO-treated HCT116 and HT29 cells followed by dose-dependent treatment of reuterin. **D)** Analysis of *Lactobacillus* growth in fecal DNA and **E)** Duodenal reuterin production in *L. reuteri* probiotic treated mice. **F)** HIF-2 $\alpha$  Western analysis of HCT116 cells with dose-dependent treatment of Rifaximin. DFO (200 $\mu$ M) used as positive control for HIF-2 $\alpha$  induction. **G)** FTN Western analysis of FAC (10 $\mu$ M) treated HCT116 cells followed by dose dependent treatment of Rifaximin. **H) & I)** Wild type SPF mice were fed with 350-ppm or <5-ppm iron diet for 1 week followed by 350-ppm, <5-ppm or rifaximin (Rfx) (20 mg/kg/day)-blended <5-ppm diet for another 2 weeks; *L. johnsonii* and *L. reuteri* growth analysis from fecal DNA (**H**) and hematological (RBC, MCV and Hct) analysis (**I**) performed.

All data are mean  $\pm$  SEM. t-test (A and D) or one way ANOVA with Tukey's multiple comparisons test (B, H and I). Western analyses: Images were analyzed by Image J software from three independent experiments, representative image shown. Statistical significance compared with DFO-only group (C), no treatment group (F) or FAC-only group (G). \* P < 0.05, \*\* P < 0.01, \*\*\* P < 0.001

**Supplementary Table 1. Related to Figure 1**

|                                | SPF                    |                      |                         | GF                    |                       |                         |
|--------------------------------|------------------------|----------------------|-------------------------|-----------------------|-----------------------|-------------------------|
|                                | A                      | B                    | C                       | D                     | E                     | F                       |
| <b>Duodenum</b>                | <b>350-ppm</b><br>n=10 | <b>35-ppm</b><br>n=9 | <b>&lt;5-ppm</b><br>n=8 | <b>350-ppm</b><br>n=5 | <b>35-ppm</b><br>n=7  | <b>&lt;5-ppm</b><br>n=8 |
| <i>Ankrd37</i>                 | 25.58                  | 32.40                | 519.63                  | 75.55                 | 128.75                | 1338.11<br>vs C: ****   |
| <i>Steap4</i>                  | 2.7                    | 2.26                 | 6.26                    | 4.2                   | 5.2                   | 8.45                    |
| <i>Arnt</i>                    | 1.13                   | 0.84                 | 1.23                    | 1.71                  | 2.07<br>vs B:<br>**** | 2.15<br>vs C: **        |
| <i>TNF-<math>\alpha</math></i> | 0.35                   | 0.18                 | 0.55                    | 0.77                  | 0.47                  | 0.48                    |
| <i>CxCl1</i>                   | 0.53                   | 0.61                 | 0.62                    | 0.63                  | 0.74                  | 1.22                    |
| <i>CxCl2</i>                   | 0.64                   | 0.37                 | 1.62                    | 0.17                  | .18                   | 0.89                    |
| <i>CCL20</i>                   | 0.74                   | 0.65                 | 0.97                    | 0.18                  | 0.72                  | 0.81                    |
| <i>Il-1<math>\beta</math></i>  | 1.1                    | 0.47                 | 0.95                    | 0.05                  | 0.05                  | 0.97                    |
| <i>Tfr1</i>                    | 1.09                   | 2.28                 | 5.24                    | 0.25                  | 3.18                  | 4.71                    |
| <i>Heph</i>                    | 0.72                   | 0.76                 | 0.87                    | 0.27                  | 0.27                  | 1.34                    |
| <i>Lcn2</i>                    | 0.42                   | 0.68                 | 0.42                    | 0.22                  | 0.42                  | 0.67                    |
| <b>Liver</b>                   | <b>350-ppm</b><br>n=10 | <b>35-ppm</b><br>n=9 | <b>&lt;5-ppm</b><br>n=8 | <b>350-ppm</b><br>n=5 | <b>35-ppm</b><br>n=7  | <b>&lt;5-ppm</b><br>n=8 |
| <i>Dmt1</i>                    | 0.54                   | 0.56                 | 0.89                    | 0.22                  | 0.55                  | 0.78                    |
| <i>Dcytb</i>                   | 0.86                   | 0.75                 | 1.07                    | 0.24                  | 0.9                   | 1.43                    |
| <i>Fpn</i>                     | 0.72                   | 0.45                 | 0.45                    | 0.26                  | 0.58                  | 0.38                    |
| <i>FtnH</i>                    | 1.00                   | 0.82                 | 0.95                    | 0.56                  | 1.29                  | 1.01                    |
| <i>Tfr1</i>                    | 0.37                   | 0.39                 | 2.89                    | 0.29                  | 0.82                  | 1.91                    |
| <i>Tfr2</i>                    | 1.1                    | 1.18                 | 1.19                    | 0.59                  | 1.12                  | 1.08                    |
| <i>Hfe</i>                     | 0.61                   | 0.84                 | 0.76                    | 0.45                  | 0.59                  | 0.79                    |
| <i>Ankrd37</i>                 | 0.74                   | 0.67                 | 1.06                    | 0.78                  | 2.29                  | 1.35                    |
| <i>Vegf</i>                    | 1.23                   | 1.45                 | 0.69                    | 0.81                  | 0.88                  | 0.87                    |
| <i>Pdk1</i>                    | 2.01                   | 1.28                 | 0.91                    | 1.2                   | 2.71                  | 1.7                     |
| <i>Pgk1</i>                    | 0.58                   | 0.33                 | 0.32                    | 0.18                  | 0.4                   | 0.34                    |
| <i>Glut1</i>                   | 0.62                   | 0.59                 | 0.37                    | 0.19                  | 0.48                  | 0.42                    |
| <b>Spleen</b>                  | <b>350-ppm</b><br>n=10 | <b>35-ppm</b><br>n=9 | <b>&lt;5-ppm</b><br>n=8 | <b>350-ppm</b><br>n=5 | <b>35-ppm</b><br>n=7  | <b>&lt;5-ppm</b><br>n=8 |
| <i>Dmt1</i>                    | 0.73                   | 0.94                 | 0.91                    | 0.84                  | 0.83                  | 1.09                    |
| <i>Tfr1</i>                    | 0.51                   | 0.87                 | 0.71                    | 0.45                  | 0.31                  | 1.24                    |
| <i>Hmox</i>                    | 0.35                   | 0.36                 | 0.43                    | 0.30                  | 0.19                  | 0.23                    |
| <i>Ankrd37</i>                 | 0.53                   | 0.48                 | 0.79                    | 0.71                  | 0.5                   | 0.54                    |
| <i>Dcytb</i>                   | 0.68                   | 0.52                 | 0.48                    | 0.79                  | 1.03                  | 0.74                    |
| <i>Fpn</i>                     | 0.4                    | 0.39                 | 0.2                     | 0.54                  | 0.3                   | 0.35                    |
| <i>Pdk1</i>                    | 0.73                   | 0.85                 | 0.71                    | 0.61                  | 0.76                  | 0.6                     |
| <i>Pgk1</i>                    | 0.49                   | 0.49                 | 0.52                    | 0.43                  | 0.32                  | 0.52                    |
| <i>Il-1<math>\beta</math></i>  | 0.41                   | 0.19                 | 0.54                    | 0.38                  | 0.17                  | 0.4                     |
| <i>Fam132b</i>                 | 0.96                   | 1.26                 | 2.52                    | 0.70                  | 1.04                  | 3.17                    |

Duodenal, Hepatic and Splenic gene expression analyses of HIF-dependent inflammatory and HIF-independent iron genes in SPF and GF mice fed with 350-ppm-, 35-ppm or < 5-ppm iron diet. Mean values presented. One way ANOVA with Tukey's multiple comparisons test. Significance (if any) shown only for SPF vs GF between corresponding diet groups. \*\* P < 0.01, \*\*\* P < 0.001.



**Supplementary Table 2. Related to Figure 2**

| <b>Name</b>                                 | <b>Cat # and Company</b> | <b>Number</b> | <b>Fold change HRE-Luc</b> |
|---------------------------------------------|--------------------------|---------------|----------------------------|
| LPS/ATP                                     | ATP: A2383 SIGMA-ALDRICH | 1             | -0.607                     |
| Acetate                                     | W302406 SIGMA-ALDRICH    | 2             | -0.177                     |
| Propionate                                  | P1880 SIGMA              | 3             | -0.500                     |
| Succinic acid                               | 398055 SIGMA-ALDRICH     | 4             | -0.185                     |
| Formate                                     | 247596 SIGMA-ALDRICH     | 5             | 0.116                      |
| Fumaric acid                                | 240745 SIGMA-ALDRICH     | 6             | -0.155                     |
| 3-Phenylpropionic acid                      | W288918 ALDRICH          | 7             | 0.025                      |
| Valeric acid                                | 240370 ALDRICH           | 8             | 0.121                      |
| 2'-Deoxycytidine 5'-monophosphate           | D7625 SIGMA              | 9             | -0.170                     |
| m-Toluic acid                               | T36609 ALDRICH           | 10            | -0.241                     |
| p-Toluic acid                               | T36803 ALDRICH           | 11            | -0.108                     |
| 4-Hydroxyphenylacetic acid                  | H50004 ALDRICH           | 12            | 0.100                      |
| N-Methyl-DL-alanine                         | 02676 SIGMA-ALDRICH      | 13            | -0.138                     |
| Pyridoxamine dihydrochloride                | 287091 ALDRICH           | 14            | 0.224                      |
| 2'-Deoxyadenosine 5'-monophosphate          | D6375 SIGMA              | 15            | -0.718                     |
| Indole-3-acetamide                          | 286281 SIGMA-ALDRICH     | 16            | -0.233                     |
| N-Acetyl-L-aspartic acid                    | 00920 SIGMA-ALDRICH      | 17            | 0.056                      |
| N-Acetyl-L-glutamic acid                    | 855642 ALDRICH           | 18            | 0.160                      |
| N-Acetylneuraminic acid                     | A0812 SIGMA              | 19            | 0.187                      |
| 4-Pyridoxic acid                            | P9630 ALDRICH            | 20            | 0.194                      |
| D-Pantothenic acid hemicalcium salt         | 21210 SIGMA              | 21            | -0.325                     |
| $\alpha$ -Ketoglutaric acid                 | 75890 SIGMA-ALDRICH      | 22            | 0.141                      |
| Cytidine 5'-monophosphate                   | C1131 SIGMA              | 23            | -0.636                     |
| 3-(4-Hydroxyphenyl)propionic acid           | H52406 ALDRICH           | 24            | 0.205                      |
| $\gamma$ -Aminobutyric acid                 | A2129 SIGMA              | 25            | -0.155                     |
| 5-Aminovaleric acid                         | 123188 ALDRICH           | 26            | 0.072                      |
| L-Homoserine                                | H6515 SIGMA              | 27            | -0.145                     |
| L-Pipecolic acid                            | P2519 SIGMA              | 28            | -0.286                     |
| L-Glyceric acid sodium salt                 | 51738 SIGMA              | 29            | -0.059                     |
| L-Tyrosine methyl ester                     | T90808 ALDRICH           | 30            | 0.345                      |
| Piperidine                                  | 104094 SIGMA-ALDRICH     | 31            | 0.036                      |
| Taurine                                     | T0625 SIGMA              | 32            | -0.018                     |
| Tyramine                                    | T90344 ALDRICH           | 33            | 0.075                      |
| Urocanic acid                               | 859796 ALDRICH           | 34            | -0.295                     |
| (3-Carboxypropyl)trimethylammonium chloride | 403245 ALDRICH           | 35            | -0.148                     |
| N-Acetyl-D-glucosamine                      | A8625 SIGMA              | 36            | 0.098                      |
| Nicotinic acid                              | N4126 SIGMA-ALDRICH      | 37            | -0.186                     |

| Name                          | Cat # and Company     | Number | Fold change HRE-Luc |
|-------------------------------|-----------------------|--------|---------------------|
| Pyridoxal hydrochloride       | P9130 SIGMA           | 38     | -0.659              |
| Pyridoxine                    | P5669 SIGMA           | 39     | -0.086              |
| Sarcosine                     | 131776 ALDRICH        | 40     | -0.013              |
| N,N-Dimethylglycine           | D1156 SIGMA           | 41     | 0.132               |
| Cytosine                      | C3506 SIGMA           | 42     | 0.234               |
| Uracil                        | U0750 SIGMA           | 43     | -0.164              |
| Adenine                       | A2786 SIGMA           | 44     | -0.126              |
| Guanine                       | G11950 ALDRICH        | 45     | -0.193              |
| Cytidine                      | C122106 ALDRICH       | 46     | 0.199               |
| 1,3-Diaminopropane            | D23602 ALDRICH        | 47     | -0.797              |
| Amino-2-propanol              | 110248 ALDRICH        | 48     | -0.151              |
| Putrescine                    | P7505 SIGMA           | 49     | 0.003               |
| Cadaverine                    | 33220 ALDRICH         | 50     | -0.104              |
| Glutaric acid                 | G3407 ALDRICH         | 51     | 0.026               |
| 5-Hydroxyindole-3-acetic acid | H8876 SIGMA           | 52     | -0.171              |
| Ornithine                     | O2375 SIGMA           | 53     | 0.290               |
| Beta-alanine                  | 146064 ALDRICH        | 54     | -0.265              |
| DL-3-Aminoisobutyric acid     | 217794 ALDRICH        | 55     | 0.071               |
| Isobutyric acid               | I1754 SIGMA           | 56     | -0.129              |
| Lactic acid                   | W261114 SIGMA-ALDRICH | 57     | 0.098               |
| Urea                          | U5378 SIGMA-ALDRICH   | 58     | 0.020               |
| DL-Malic acid                 | 240176 SIGMA-ALDRICH  | 59     | -0.102              |
| Xanthine                      | X0626 SIGMA-ALDRICH   | 60     | -0.477              |
| L-Citrulline                  | C7629 SIGMA-ALDRICH   | 61     | -0.457              |
| Hypoxanthine                  | H9377 SIGMA-ALDRICH   | 62     | -0.166              |
| L-Methionine                  | M9625 SIGMA-ALDRICH   | 63     | -0.391              |
| Spermidine                    | S2626 SIGMA-ALDRICH   | 64     | -0.302              |
| LPS                           | L2630 SIGMA-ALDRICH   | 65     | -0.463              |
| Butyrate                      | 303410 SIGMA-ALDRICH  | 66     | -0.839              |
| <i>E. coli</i> (live)         |                       | 67     | -0.461              |
| <i>E. coli</i> (heat-killed)  |                       | 68     | 0.022               |

**Supplementary Table 3: Primers. Related to STAR Methods**  
**A. qPCR Primers**

| Mouse genes       | Forward (5'--3')           | Reverse (5'--3')          |
|-------------------|----------------------------|---------------------------|
| <i>β-actin</i>    | TATTGGCAACGAGCGGTTCC       | GGCATAGAGGTCTTTACGGATGT   |
| <i>Dmt1</i>       | TGTTTGATTGCATTGGGTCTG      | CGCTCAGCAGGACTTTCGAG      |
| <i>DcytB</i>      | CATCCTCGCCATCATCTC         | GGCATTGCCTCCATTTAGCTG     |
| <i>Hepcidin</i>   | CTATCTCCATCAACAGATGAGACAGA | AACAGATAACCACACTGGGAA     |
| <i>Ankrd37</i>    | CGGCCTTGCGTGCTTT           | TGGTTGAGGTCAGCACCTGTT     |
| <i>STEAP4</i>     | GGAAACTCATCTGCATGTGCT      | CTAGAAGGCAGAGCCCACC       |
| <i>ARNT</i>       | CAAGCCATCTTTCCTCACTGATC    | ACACCACCCGTCAGTCTCA       |
| <i>TNF-α</i>      | AGGGTCTGGGCCATAGAACT       | CCACCACGCTCTTCTGTCTAC     |
| <i>CXCL1</i>      | TCTCCGTTACTTGGGGACAC       | CCCACTCAAGAATGGTCGC       |
| <i>CXCL2</i>      | TCCAGGTCAGTTAGCCTTGC       | CGGTCAAAAAGTTTGCCTTG      |
| <i>CCL20</i>      | TGTACGAGAGGCAACAGTCG       | TCTGCTCTTCCTTGCTTTGG      |
| <i>IL-1β</i>      | AAGAGCTTCAGGCAGGCAGTATCA   | TGCAGCTGTCTAGGAACGTCA     |
| <i>TfR1</i>       | GGAAGACTCTGCTTTGCAGCTAT    | GCCCAGGTAGCCCATCATGA      |
| <i>Heph</i>       | FTGGGCTTCCTAGGACCACTGT     | RGCAAAATTCTTCAGGTGAATCAAG |
| <i>Lipocalin2</i> | CACCACGGACTACAACCAGTTCGC   | TCAGTTGTCAATGCATTGGTCGGTG |
| <i>TfR2</i>       | TAGCCCTCCAACCACTCTGT       | CTCTTCCATGGTCAGCAATG      |
| <i>HFE</i>        | CACCGCGTTCACATTCTCTAA      | CTGGCTTGAGGTTTGCTCC       |
| <i>VEGF</i>       | CCACGTCAGAGAGCAACATCA      | TCATTCTCTCTATGTGCTGGCTTT  |
| <i>PDK1</i>       | TTACTCAGTGGAACACCGCC       | GTTTATCCCCGATTCAGGT       |
| <i>PGK1</i>       | CAAATTTGATGAGAATGCCAAGACT  | TTCTTGCTGCTCTCAGTACCACA   |
| <i>Glut1</i>      | CAAGTCTGCATTGCCCATGAT      | CCAGCTGGGAATCGTCGTT       |

|                    |                         |                         |
|--------------------|-------------------------|-------------------------|
| <i>Hmox1</i>       | AGGTACACATCCAAGCCGAGA   | CATCACCAGCTTAAAGCCTTCT  |
| <i>Fam132b</i>     | ATGGGGCTGGAGAACAGC      | TGGCATTGTCCAAGAAGACA    |
| <i>Ftnh1</i>       | GGCAAAGTTCTTCAGAGCCA    | CATCAACCGCCAGATCAAC     |
| <b>Human genes</b> | <b>Forward (5'--3')</b> | <b>Reverse (5'--3')</b> |
| <i>β-actin</i>     | GTTGTCGACGACGAGCG       | GCACAGAGCCTCGCCTT       |
| <i>DMT1</i>        | GCTCTCATACCCATCCTCACATT | TCCATTGGCAAAGTCACTCATT  |
| <i>DCYTB</i>       | CATGGTCACCGGCTTCGT      | CAG GTCCACGGCAGTCTGTA   |
| <i>TNF-α</i>       | AGATGATCTGACTGCCTGGG    | CTGCTGCACTTTGGAGTGAT    |
| <i>IL-1β</i>       | AAGCCCTTGCTGTAGTGGTG    | GAAGCTGATGGCCCTAAACA    |
| <i>IL8</i>         | AGCACTCCTTGCCAAAAGT     | CGGAAGGAACCATCTCACTG    |
| <i>CXCL1</i>       | AACAGCCACCAGTGAGCTTC    | GAAAGCTTGCCTCAATCCTG    |
| <i>CXCL2</i>       | CTTCAGGAACAGCCACCAAT    | CACACTCAAGAATGGGCAGA    |
| <i>CCL20</i>       | CGTGTGAAGCCCACAATAAA    | GTGCTGCTACTCCACCTCTG    |
| <i>HIF-2α</i>      | CATCCCGGGACTTCTCCT      | GTCTGAACGTCTCAAAGGGC    |

## B. Cloning Primers

|                    | <b>Forward (5'--3')</b>          | <b>Reverse (5'--3')</b>            |
|--------------------|----------------------------------|------------------------------------|
| Mouse Hif-2α G324E | TGTAGATGACCGTCTCCTGGGTCTCCAGC    | GCTGGAGACCCAGGAGACGGTCATCTACA      |
| Mouse Hif-2α S305M | CCGGTACTGGCCATTACCACCTGCCCTTGGTG | CACCAAGGGGCAGGTGGTAATGGGCCAGTACCGG |

### C. Bacterial Primers

|                       | Forward (5'--3')                 | Reverse (5'--3')                 |
|-----------------------|----------------------------------|----------------------------------|
| All Bacteria          | ACTCCTACGGGAGGCAGCAG             | ATTACCGCGGCTGCTGG                |
| <i>L. johnsonii</i>   | TCTTCCAATTTTCGGCAGT              | CAGTGGGAGCTACAGAAGCA             |
| <i>L. reuteri</i>     | ACCGAGAACACCGCGTTATTT            | CATAACTTAACCTAAACAATCAAAGATTGTCT |
| <i>L. acidophilus</i> | GAAAGAGCCCAAACCAAGTGATT          | CTCCCAGATAATTCAACTATCGCTTA       |
| <i>L. brevis</i>      | GCACAAGATGGCTCATGACGTTAAGACTAAGG | GTCTAAGCTCGTATCAACCCACGGG        |
| <i>L. helveticus</i>  | GTCTAAGCTCGTATCAACCCACGGG        | GATCAACAATGACTTGCCTTGTTGAACAATTC |

### D. CRISPR guide RNA for mouse NCOA4, exon 3

5'-AGAGGTGTGGCTCAATGAAC-3'
